# Supplementary material for: Identification of Dish-Based Dietary Patterns for Breakfast, Lunch, and Dinner and Their Diet Quality in Japanese Adults
Source: MDPI journal article supplement (doi:10.3390/nu13010067), 2020-12-28
Supplement: s1 [file s1]

**Table S1.** Dish groups used in this study

| <b>Dish group</b> |                              |                                                                                                                                                                                                                                                                      |
|-------------------|------------------------------|----------------------------------------------------------------------------------------------------------------------------------------------------------------------------------------------------------------------------------------------------------------------|
| <b>ID</b>         | <b>Name</b>                  | <b>Dish items</b>                                                                                                                                                                                                                                                    |
| 1                 | Rice                         | White rice, brown rice, rice with mixed grains; red rice, beans rice; takikomi or mixed rice (rice seasoned and cooked with various ingredients), boiled rice with natto, raw egg mixed with white rice                                                              |
| 2                 | Porridge                     | Porridge, oatmeal; ochazuke (boiled rice with tea); zousui (porridge of rice and vegetables), risotto, gukbap (Korean rice soup)                                                                                                                                     |
| 3                 | Curry and rice/omelette rice | Curry and rice, hash and rice; omelette rice                                                                                                                                                                                                                         |
| 4                 | Fried rice/pilaf/doria       | Pilaf, chicken rice, dry curried rice; doria, rice gratin; fried rice; gratin, lasagne                                                                                                                                                                               |
| 5                 | Sushi/rice bowl dishes       | Nigiri sushi, rolled sushi; chirashizushi; kaisen-don (bowl of rice topped with sashimi); beef rice bowl; pork cutlet rice bowl; oyako-don (chicken and egg rice bowl), oyakodon-like dish made with something other than chicken; grilled eel and rice; other bowls |
| 6                 | Rice ball                    | Rice ball                                                                                                                                                                                                                                                            |
| 7                 | Rice cake                    | Rice cake (not sweet)                                                                                                                                                                                                                                                |
| 8                 | Plain bread                  | Toast; rolls; coppepan (similar to a hot dog bun); French bread; Danish pastry, croissant                                                                                                                                                                            |
| 9                 | Sweet bread/savoury bread    | Sweet bread; toast with cheese, tuna, ham or other toppings; French toast, garlic toast; filled & stuffed bread; hot dog, corn dog; sandwich; hamburger                                                                                                              |
| 10                | Udon/soba                    | Udon (thick wheat noodles), houtou, suiton (flour dumplings boiled in soup); somen, hiyamugi, nyuumen (thin wheat noodles); soba (buckwheat noodles); yakisoba (fried noodles); yakiudon (stir-fried udon);                                                          |
| 11                | Pasta                        | Pasta                                                                                                                                                                                                                                                                |
| 12                | Ramen                        | Instant noodle; other ramen, champon (a dish of noodles with seafood, vegetables, etc.)                                                                                                                                                                              |
| 13                | Other noodles                | Somin chanpuru (Okinawan-style stir-fried somen noodles); hiyashi-chuka (chilled Chinese noodles); fried rice noodles; Okinawa soba, soki soba; other noodles                                                                                                        |
| 14                | Okonomiyaki/takoyaki/pizza   | Okonomiyaki (savoury pancake with various ingredients); takoyaki (octopus dumplings), negiyaki (green spring onion pancake); pizza; tacos; sweet pancakes                                                                                                            |
| 15                | Cereal                       | Cereal                                                                                                                                                                                                                                                               |
| 16                | Potato dishes                | Nikujaga (meat and potato stew); simmered potatoes; steamed, boiled, or roasted potatoes; grated yam; yam strips; potato salad; potato croquette; cream croquette; German potato; cheese-grilled potato; stir-fried potato; fried potato, potato tempura             |
| 17                | Natto (fermented soybeans)   | Natto (fermented soybeans)                                                                                                                                                                                                                                           |

Table S1. *Cont.*

| Dish group |                                          | Dish items                                                                                                                                                                                                                                                                                                                                                                                                                                                                                                                                                                                                         |
|------------|------------------------------------------|--------------------------------------------------------------------------------------------------------------------------------------------------------------------------------------------------------------------------------------------------------------------------------------------------------------------------------------------------------------------------------------------------------------------------------------------------------------------------------------------------------------------------------------------------------------------------------------------------------------------|
| ID         | Name                                     |                                                                                                                                                                                                                                                                                                                                                                                                                                                                                                                                                                                                                    |
| 18         | Tofu dishes                              | Chilled tofu; boiled tofu; agedashi-tofu (deep-fried tofu); unohana (simmered soybean pulp); iri-doufu (stir-fried tofu), simmered tofu; koya-doufu (freeze-dried tofu simmered in seasoned broth); mabo tofu, tofu topped with a sticky sauce; soybean hamburger, tofu hamburger; tofu dengaku (tofu with sweet miso sauce), tofu steak, grilled tofu; fried tofu, fried atsugae (thick fried tofu); raw or baked atsugae; simmered atsugae, simmered ganmodoki (fried mixture of crushed tofu, vegetables and ground yam); grilled aburaage (thin fried tofu); yuba (film formed on surface of warmed soy milk); |
| 19         | Bean dishes                              | Boiled beans (soybean, black soybean); boiled beans (except for soybeans); boiled beans; kinako (roasted and ground beans), roasted soybean                                                                                                                                                                                                                                                                                                                                                                                                                                                                        |
| 20         | Nut dishes                               | Ginkgo nuts, chestnuts; goma-tofu, peanut tofu (tofu-like gel made from sesame or peanut paste and kudzu starch); other nuts, sesame seeds                                                                                                                                                                                                                                                                                                                                                                                                                                                                         |
| 21         | Japanese-style vegetable side dishes     | Aemono (sauce-dressed dishes), neta (salad with vinegar and miso); ohitashi (boiled vegetables); sunomono (vinegared dish); shiomomi, misotsuke (vegetables seasoned with salt or miso)                                                                                                                                                                                                                                                                                                                                                                                                                            |
| 22         | Raw or boiled vegetable dishes           | Grated daikon radish; tomato; other raw vegetables, vegetable garnish; boiled, steamed, or canned vegetables; vegetable salad; seaweed salad; harusame noodle salad; spaghetti salad, macaroni salad; boiled corn                                                                                                                                                                                                                                                                                                                                                                                                  |
| 23         | Simmered vegetable dishes                | Simmered dried-radish; kinpira; furofuki daikon (simmered daikon radish with miso sauce); yasai dengaku (vegetables with sweet miso sauce); simmered vegetables (root vegetables); simmered vegetables (other vegetables); vegetables topped with a sticky sauce                                                                                                                                                                                                                                                                                                                                                   |
| 24         | Grilled or stir-fried vegetable dishes   | Grilled eggplant; other grilled vegetables; mabo eggplant, stir-fried eggplant; papaya stir fry; goya champuru (bitter melon stir fry with tofu and egg); vegetable stir fry (others); vegetable stir fry (vegetables only); harusame noodle stir fry                                                                                                                                                                                                                                                                                                                                                              |
| 25         | Deep-fried vegetable dishes              | Kakiage (mixed tempura); tempura and deep-fried vegetables; deep-fried stuffed vegetables                                                                                                                                                                                                                                                                                                                                                                                                                                                                                                                          |
| 26         | Mushrooms/seaweed/konnyaku dishes        | Mozuku, mekabu (root of wakame seaweed); wakame, kelp; laver; stewed mushrooms; stewed seaweed, tangle roll; konnyaku (paste made from konnyaku flour) dish; stir-fried or grilled mushrooms                                                                                                                                                                                                                                                                                                                                                                                                                       |
| 27         | Fruit/fruit dishes                       | Banana; strawberry (raw); apple (raw); persimmon (raw); pear (raw); grape (raw); mandarin orange (raw); other citrus (raw); other raw fruits; assorted fruit platter; canned fruits, compote; dried persimmon; other dried fruits; fruit punch; fruit salad                                                                                                                                                                                                                                                                                                                                                        |
| 28         | Raw fish dishes                          | Sashimi (fish); sashimi (squid, shrimp, octopus, shellfish); sashimi (assorted seafood); yamakake (raw fish topped with grated yam); marinated or picked seafood                                                                                                                                                                                                                                                                                                                                                                                                                                                   |
| 29         | Seafood dishes (steamed/boiled/simmered) | Boiled seafood; steamed seafood; buri daikon (yellowtail and daikon cooked with soy sauce); fry-simmered fish, nanbanzuke (fried fish in sweet and peppery vegetable sauce); simmered fish with seasoning (white fish including salmon); simmered fish with seasoning (other fish); simmered squid, shrimp, octopus, or shellfish                                                                                                                                                                                                                                                                                  |

Table S1. *Cont.*

| Dish group |                                      |                                                                                                                                                                                                                                                                                                                                                                                                                                                                                     |
|------------|--------------------------------------|-------------------------------------------------------------------------------------------------------------------------------------------------------------------------------------------------------------------------------------------------------------------------------------------------------------------------------------------------------------------------------------------------------------------------------------------------------------------------------------|
| ID         | Name                                 | Dish items                                                                                                                                                                                                                                                                                                                                                                                                                                                                          |
| 30         | Grilled or stir-fried seafood dishes | Kasuzuke (fish pickled in sake lees), miso-marinated fish; kabayaki (broiled fish); teriyaki fish, yawatamaki (burdock rolled with fish); meuniere fish, fish in butter sauce; dried fish (white fish); dried fish (other fish); grilled fish (salmon and trout); grilled fish (white salted fish except salmon or trout); grilled fish (other fish); grilled squid, shrimp, octopus, or shellfish; happousai (chop suey); shrimps with chili sauce; other fried fish and shellfish |
| 31         | Deep-fried fish dishes               | Fish tempura, fried fish (white fish including salmon); fish tempura, fried fish (other fish); shrimp tempura, fried shrimp (excluding kara-age); squid tempura, fried squid (excluding kara-age); shrimp or squid kara-age; fried oyster; fried crab, octopus or scallop; fish topped with a sticky sauce                                                                                                                                                                          |
| 32         | Fish jelly product dishes            | Fish jelly products (raw, baked); simmered dish containing fish jelly products; stir-fried food containing fish jelly products; fish jelly products tempura and fried fish jelly products                                                                                                                                                                                                                                                                                           |
| 33         | Canned fish/seafood delicacy         | Salmon flakes; canned tuna; canned Pacific saury, mackerel or sardines; small dried sardines; dried whitebait; smoked squid; cod roe; salmon roe; other fish eggs; salted fish and shellfish, fish delicacy                                                                                                                                                                                                                                                                         |
| 34         | Meat dishes (raw/boiled/steamed)     | Raw meat, roast beef; tonsoku (pig's feet), boiled pork; steamed chicken                                                                                                                                                                                                                                                                                                                                                                                                            |
| 35         | Gyoza dumplings/shumai/meatballs     | Fried gyoza dumplings; boiled or steamed gyoza dumplings (except shrimp dumplings); deep-fried gyoza dumplings; shumai (steamed Chinese dumplings); meat-stuffed vegetables; meat roll-ups; meatballs (beef, pork); seasoned ground meat, meat sauce; ground beef                                                                                                                                                                                                                   |
| 36         | Simmered meat with seasoning         | Simmered beef; simmered pork; boiled dish (Okinawa style); chikuzenni (simmered root vegetables with chicken); other simmered chicken dish; simmered lever or tripe; stuffed cabbage rolls                                                                                                                                                                                                                                                                                          |
| 37         | Grilled or stir-fried meat dishes    | Spit-roasted beef or pork; beef steak; other grilled beef; chicken steak, chicken piccata; ginger fried pork; other grilled pork; other pork dishes; chicken meatballs; yakitori (skewered chicken); teriyaki chicken; other grilled chicken; teppanyaki (food roasted on a hot plate.), barbeque; grilled horsemeat or mutton; meatloaf; stir-fried beef; stir-fried pork; stir-fried chicken; stir-fried or grilled lever, tripe                                                  |
| 38         | Deep-fried meat dishes               | Breaded ground meat cutlet; subuta (sweet and sour pork); chicken namban (fried chicken with vinegar and tartar sauce); pork cutlet; pork kara-age; chicken kara-age; kushikatsu (deep-fried skewers) and other deep-fried meat                                                                                                                                                                                                                                                     |
| 39         | Processed meat dishes                | Wieners, sausage (not deep-fried); ham; ham roll-ups; bacon; barbecued pork; stir-fried processed meat (except for wieners, sausage); deep-fried processed meat                                                                                                                                                                                                                                                                                                                     |
| 40         | Egg dishes                           | Boiled egg, soft-boiled egg, raw egg; fried egg; ham and egg, bacon and egg; tamago-yaki (Japanese rolled omelette); omelette; scrambled egg; niratama (garlic chive scrambled eggs); egg tofu, chawanmushi (steamed egg custard); tamagotoji (egg soup); kanitama (crab and egg); other egg dishes                                                                                                                                                                                 |

Table S1. *Cont.*

| Dish group |                              |                                                                                                                                                                                                                                                                                                                                                                                                                                                                                                                                                                                                                                                                                                                                                                                                                                                                                                                                                                                                                                                                                                                                                                                                                                                             |
|------------|------------------------------|-------------------------------------------------------------------------------------------------------------------------------------------------------------------------------------------------------------------------------------------------------------------------------------------------------------------------------------------------------------------------------------------------------------------------------------------------------------------------------------------------------------------------------------------------------------------------------------------------------------------------------------------------------------------------------------------------------------------------------------------------------------------------------------------------------------------------------------------------------------------------------------------------------------------------------------------------------------------------------------------------------------------------------------------------------------------------------------------------------------------------------------------------------------------------------------------------------------------------------------------------------------|
| ID         | Name                         | Dish items                                                                                                                                                                                                                                                                                                                                                                                                                                                                                                                                                                                                                                                                                                                                                                                                                                                                                                                                                                                                                                                                                                                                                                                                                                                  |
| 41         | Milk/soymilk                 | Milk (normal or high fat); milk (low fat); soymilk                                                                                                                                                                                                                                                                                                                                                                                                                                                                                                                                                                                                                                                                                                                                                                                                                                                                                                                                                                                                                                                                                                                                                                                                          |
| 42         | Yogurt/cheese                | Yogurt; fruit yogurt; cheese                                                                                                                                                                                                                                                                                                                                                                                                                                                                                                                                                                                                                                                                                                                                                                                                                                                                                                                                                                                                                                                                                                                                                                                                                                |
| 43         | Japanese confectionery       | Daigakuimo (candied sweet potato), sweet potato (confection made from sweet potatoes); kinton (mashed sweet potatoes), sweet potato ball; dried sweet potato; rice cracker, are (glutinous rice cracker), other savoury rice crackers; rakugan (moulded dry confectionary made from fine roasted glutinous rice flour and sugar), okoshi (puffed sweet rice cake), boro (small balls of baked starch dough); daifuku (sweet rice cake stuffed with red bean paste), rice-cake sweets; manjuu (sponge cake stuffed with red bean paste), monaka (glutinous rice wafers with red bean paste filling); ohagi (rice ball coated with sweetened red beans, soybean flour, or sesame and salt), shiruko (sweet red-bean soup); taiyaki (a fish-shaped pancake filled with bean jam), dorayaki (Japanese pancake sandwich with red bean paste filling), (Japanese waffle stuffed with red bean paste); castella; yokan (sweet beans jelly), nerikiri (Japanese artistic cake); other beans or nut sweets; karinto (crunchy deep fried wheat flour dough coated with white sugar), imokenpi (deep fried sweet potato chips, coated with sugar syrup), vegetable chips; steamed bread, chukaman (Chinese steamed bun); raw sugar block; other Japanese confectionery |
| 44         | Ice cream/jelly/pudding/cake | Shaved ice, sherbet; ice cream, milk shake, pudding, bavaroa, mousse; jelly, agar; waffle, cream puff; doughnut; cake and other Western confectionery                                                                                                                                                                                                                                                                                                                                                                                                                                                                                                                                                                                                                                                                                                                                                                                                                                                                                                                                                                                                                                                                                                       |
| 45         | Chocolate/cookies/candy      | Cookie, cracker, pretzel, wafer; chocolate, chocolate confectionery, candy, gum, marshmallow                                                                                                                                                                                                                                                                                                                                                                                                                                                                                                                                                                                                                                                                                                                                                                                                                                                                                                                                                                                                                                                                                                                                                                |
| 46         | Snacks                       | Kakinotane (seed-sized rice crackers); potato crisps; snack food; assortment of snacks                                                                                                                                                                                                                                                                                                                                                                                                                                                                                                                                                                                                                                                                                                                                                                                                                                                                                                                                                                                                                                                                                                                                                                      |
| 47         | Coffee/tea                   | Coffee (excluding coffee-flavoured milk); tea                                                                                                                                                                                                                                                                                                                                                                                                                                                                                                                                                                                                                                                                                                                                                                                                                                                                                                                                                                                                                                                                                                                                                                                                               |
| 48         | Japanese and Chinese tea     | Other tea (barley tea, oolong tea etc.); water, sugar-free carbonated water, 0 kcal beverage                                                                                                                                                                                                                                                                                                                                                                                                                                                                                                                                                                                                                                                                                                                                                                                                                                                                                                                                                                                                                                                                                                                                                                |
| 49         | Cocoa/milk beverage          | Cocoa, Milo; coffee-or fruit- flavoured milk, fruit milk, latte; lactic acid bacteria beverage, yogurt drink                                                                                                                                                                                                                                                                                                                                                                                                                                                                                                                                                                                                                                                                                                                                                                                                                                                                                                                                                                                                                                                                                                                                                |
| 50         | Vegetable and fruit juice    | Vegetable juice, green juice; fruit juice                                                                                                                                                                                                                                                                                                                                                                                                                                                                                                                                                                                                                                                                                                                                                                                                                                                                                                                                                                                                                                                                                                                                                                                                                   |
| 51         | Soft drink                   | Sports drink; sugar-sweetened soda; other soft drink; kudzu-yu (arrowroot gruel), amazake (sweet sake); energy drink; shougayu (ginger soup), tamagoyu (egg drink); vinegar drink                                                                                                                                                                                                                                                                                                                                                                                                                                                                                                                                                                                                                                                                                                                                                                                                                                                                                                                                                                                                                                                                           |
| 52         | Japanese sake/shochu         | Japanese sake, shochu, awamori (on the rocks/with tea, water, hot water); white sake                                                                                                                                                                                                                                                                                                                                                                                                                                                                                                                                                                                                                                                                                                                                                                                                                                                                                                                                                                                                                                                                                                                                                                        |
| 53         | Beer                         | Beer, happoushu (sparkling alcoholic beverages)                                                                                                                                                                                                                                                                                                                                                                                                                                                                                                                                                                                                                                                                                                                                                                                                                                                                                                                                                                                                                                                                                                                                                                                                             |
| 54         | Fruit liquor/wine            | Fruit liquor, cocktail; wine; whiskey and other Western liquors                                                                                                                                                                                                                                                                                                                                                                                                                                                                                                                                                                                                                                                                                                                                                                                                                                                                                                                                                                                                                                                                                                                                                                                             |

Table S1. *Cont.*

| Dish group |                                   |                                                                                                                                                                                                                                                                                                                   |
|------------|-----------------------------------|-------------------------------------------------------------------------------------------------------------------------------------------------------------------------------------------------------------------------------------------------------------------------------------------------------------------|
| ID         | Name                              | Dish items                                                                                                                                                                                                                                                                                                        |
| 55         | Miso soup                         | Miso soup; suimono and sumashijiru (clear soup); other kinds of Japanese style soup; tonjiru (miso soup with pork and vegetables); nakami-jiru (Okinawan pork tripe soup); kasujiru (soup with a sake lees base); somen soup; soki-jiru (Okinawan pork spareribs soup); zouni (rice cakes boiled with vegetables) |
| 56         | Western or Chinese soup           | Potage, cream soup; wan-tun soup, dumpling soup, harusame soup; other Western or Chinese soup                                                                                                                                                                                                                     |
| 57         | Hot pot dishes                    | Borscht, pot-au-feu; stew, beef stroganoff; oden (fish paste stew); shabu-shabu (thin-sliced meat simmered in hot water); sukiyaki hot pot; other hot pot dishes                                                                                                                                                  |
| 58         | Tsukudani/pickles                 | Tsukudani (seafood); tsukudani (vegetables and seaweeds); pickled plum; kimchi; pickled scallion, vinegar pickles; other pickles; miso                                                                                                                                                                            |
| 59         | Spring rolls/assorted fried foods | Deep-fried food wrapped in dumplings skins; spring roll; assorted fried foods                                                                                                                                                                                                                                     |

**Table S2.** Reference daily values used to calculate NRF9.3 <sup>a</sup>

| Variable                                 | Values for men aged 30–49 years |
|------------------------------------------|---------------------------------|
| Energy (kcal) <sup>b</sup>               | 2700                            |
| Energy (kJ) <sup>b</sup>                 | 11297                           |
| Qualifying nutrients                     |                                 |
| Protein (g) <sup>c</sup>                 | 65                              |
| Dietary fibre (g) <sup>d</sup>           | 21                              |
| Vitamin A (µg RAE) <sup>c</sup>          | 900                             |
| Vitamin C (mg) <sup>c</sup>              | 100                             |
| Vitamin D (µg) <sup>e</sup>              | 8.5                             |
| Calcium (mg) <sup>c</sup>                | 750                             |
| Iron (mg) <sup>c</sup>                   | 7.5                             |
| Potassium (mg) <sup>d</sup>              | 3000                            |
| Magnesium (mg) <sup>c</sup>              | 370                             |
| Disqualifying nutrients                  |                                 |
| Added sugars (g) <sup>f</sup>            | 33.75                           |
| Saturated fats (g) <sup>g</sup>          | 21                              |
| Sodium (g NaCl equivalent) <sup>dh</sup> | 7.5                             |

NRF9.3, Nutrient-Rich Food Index 9.3; RAE, retinol activity equivalent. <sup>a</sup> Values were derived from the Dietary Reference Intakes for Japanese, 2020 [32], except for added sugars (as shown below). <sup>b</sup> Estimated Energy Requirement for moderate level of physical activity. <sup>c</sup> Recommended Dietary Allowance. <sup>d</sup> Tentative dietary goal for preventing lifestyle-related diseases (DG). <sup>e</sup> Adequate Intake. <sup>f</sup> Determined based on the World Health Organization's conditional recommendation (5% of energy) [34]. <sup>g</sup> Determined based on the DG value (7% of energy). <sup>h</sup> 7.5 g NaCl equivalent = 2952 mg sodium.

**Table S3.** Food groups used in this study

| <b>Food groups</b>        | <b>Major food items</b>                                                                                                                                                                                                          |
|---------------------------|----------------------------------------------------------------------------------------------------------------------------------------------------------------------------------------------------------------------------------|
| Rice                      | White rice, wheat, millet, amaranthus, corn                                                                                                                                                                                      |
| Bread                     | White bread, butter roll, baguette, croissant                                                                                                                                                                                    |
| Noodles                   | Spaghetti, Japanese noodles (buckwheat and Japanese wheat noodles), instant noodles, Chinese noodles                                                                                                                             |
| Other grain products      | Wheat flour, wheat products, cornflakes                                                                                                                                                                                          |
| Potatoes                  | Potatoes, sweet potatoes, yams and taro; konnyaku                                                                                                                                                                                |
| Sugars                    | Jam and marmalade, sugar, honey, maple syrup                                                                                                                                                                                     |
| Total vegetables          | Carrots, onions, cabbage, Japanese leek, cucumbers, pumpkins, tomatoes, green peppers, broccoli, lettuce, Chinese cabbage, bean sprouts, radishes, cauliflower, eggplants, burdock, lotus root, mushrooms, wakame, hijiki, laver |
| Pulses (including nuts)   | Peanuts, other nuts, tofu, other tofu products, natto, beans, miso                                                                                                                                                               |
| Fruits                    | Raisins, canned fruits, oranges, bananas, apples, strawberries, grapes, peaches, pears, persimmons, kiwi fruits, melons, watermelons                                                                                             |
| Fish and shellfish        | Skipjack tuna, fish products, salmon, squid, sardine, shrimp, Pacific saury, shell fish                                                                                                                                          |
| Meats                     | Pork, chicken, beef, sausage, ham, ground meet, bacon                                                                                                                                                                            |
| Eggs                      | Eggs                                                                                                                                                                                                                             |
| Dairy products            | Milk, cheese, yogurt                                                                                                                                                                                                             |
| Fats and oils             | Lard, butter, margarine, mayonnaise, salad dressing, oil                                                                                                                                                                         |
| Confectioneries           | Japanese bread with a sweet filling, doughnuts, pancakes, potato chips, rice crackers, Japanese sweets, cakes, cookies and biscuits, chocolates, candies, caramels, and chewing gum, jellies, ice cream                          |
| Fruit and vegetable juice | Fruit juice, vegetable juice                                                                                                                                                                                                     |
| Alcoholic beverages       | Beer, sake, shochu, whiskey, wine                                                                                                                                                                                                |
| Soft drinks               | Sugar-sweetened beverages                                                                                                                                                                                                        |
| Tea and coffee            | Green tea, coffee, barley tea, black tea, oolong tea, brown rice tea                                                                                                                                                             |
| Seasonings and spices     | Soy sauce, salt, vinegar, soup stock, ketchup, herb and spice                                                                                                                                                                    |

Table S4. Comparison of weight (g) of food groups among dish-based dietary patterns for each meal <sup>1</sup>

|                           | Breakfast   |     |            |     |         | Lunch              |     |                    |     |                    |      |                    |      |                        |      | Dinner        |                    |                    |                    |           |                    |                |         |
|---------------------------|-------------|-----|------------|-----|---------|--------------------|-----|--------------------|-----|--------------------|------|--------------------|------|------------------------|------|---------------|--------------------|--------------------|--------------------|-----------|--------------------|----------------|---------|
|                           | Bread-based |     | Rice-based |     |         | Bread              |     | Rice-based         |     | Ramen              |      | Udon/soba          |      | Sushi/rice bowl dishes |      | Miscellaneous |                    | Meat dish and Beer |                    |           |                    | Hot pot dishes |         |
|                           | (n = 983)   |     | (n = 479)  |     |         | (n = 781)          |     | (n = 393)          |     | (n = 99)           |      | (n =125)           |      | (n = 106)              |      | (n = 1211)    |                    | (n = 165)          |                    | (n = 124) |                    |                |         |
|                           | Mean        | SE  | Mean       | SE  | P       | Mean               | SE  | Mean               | SE  | Mean               | SE   | Mean               | SE   | Mean                   | SE   | P             | Mean               | SE                 | Mean               | SE        | Mean               | SE             | P       |
| Rice                      | 38.0        | 2.3 | 117.3      | 4.3 | <0.0001 | 134.8 <sup>a</sup> | 3.5 | 168.6 <sup>b</sup> | 4.3 | 40.8 <sup>c</sup>  | 7.3  | 54.2 <sup>c</sup>  | 7.4  | 208.1 <sup>d</sup>     | 7.6  | <0.0001       | 143.8 <sup>a</sup> | 3.0                | 97.6 <sup>b</sup>  | 7.7       | 113.8 <sup>b</sup> | 9.6            | <0.0001 |
| Bread                     | 37.1        | 1.3 | 15.1       | 1.6 | <0.0001 | 11.7 <sup>a</sup>  | 1.1 | 3.6 <sup>b</sup>   | 0.9 | 2.5 <sup>b</sup>   | 1.4  | 2.2 <sup>b</sup>   | 1.1  | 0.8 <sup>b</sup>       | 0.6  | <0.0001       | 2.0                | 0.4                | 0.9                | 0.6       | 2.3                | 1.1            | 0.57    |
| Noodles                   | 2.3         | 0.7 | 6.3        | 1.5 | 0.006   | 13.6 <sup>a</sup>  | 1.7 | 18.1 <sup>a</sup>  | 2.8 | 200.5 <sup>b</sup> | 6.9  | 221.2 <sup>c</sup> | 7.2  | 11.7 <sup>a</sup>      | 4.3  | <0.0001       | 32.4               | 2.4                | 22.6               | 4.7       | 23.9               | 6.3            | 0.22    |
| Other grain products      | 1.7         | 0.3 | 3.1        | 0.9 | 0.07    | 6.4                | 1.0 | 4.8                | 0.8 | 1.9                | 0.9  | 4.3                | 0.9  | 6.3                    | 1.6  | 0.35          | 5.8                | 0.5                | 8.8                | 1.8       | 5.5                | 2.7            | 0.19    |
| Potatoes                  | 2.3         | 0.3 | 5.0        | 0.8 | 0.0002  | 15.3 <sup>a</sup>  | 1.0 | 15.5 <sup>a</sup>  | 1.7 | 2.1 <sup>b</sup>   | 0.7  | 4.1 <sup>b</sup>   | 1.2  | 8.2 <sup>ab</sup>      | 1.8  | <0.0001       | 20.4 <sup>a</sup>  | 1.1                | 25.9 <sup>a</sup>  | 4.2       | 45.9 <sup>b</sup>  | 6.1            | <0.0001 |
| Sugar                     | 4.3         | 0.3 | 2.9        | 0.4 | 0.007   | 4.1 <sup>a</sup>   | 0.3 | 3.6 <sup>a</sup>   | 0.3 | 1.9 <sup>a</sup>   | 0.4  | 2.5 <sup>a</sup>   | 0.4  | 8.9 <sup>b</sup>       | 1.9  | <0.0001       | 3.4                | 0.2                | 3.6                | 0.5       | 2.8                | 0.4            | 0.53    |
| Pulses and nuts           | 10.4        | 1.1 | 30.2       | 2.0 | <0.0001 | 15.2               | 1.2 | 14.0               | 1.6 | 9.3                | 3.5  | 7.0                | 1.5  | 16.7                   | 2.6  | 0.03          | 32.2 <sup>a</sup>  | 1.6                | 26.4 <sup>a</sup>  | 3.9       | 69.1 <sup>b</sup>  | 6.6            | <0.0001 |
| Total vegetables          | 23.2        | 1.3 | 46.8       | 2.4 | <0.0001 | 88.8 <sup>a</sup>  | 2.9 | 92.2 <sup>a</sup>  | 3.9 | 61.6 <sup>b</sup>  | 6.4  | 67.0 <sup>b</sup>  | 6.1  | 87.3 <sup>ab</sup>     | 6.2  | 0.0003        | 129.7 <sup>a</sup> | 2.9                | 146.2 <sup>a</sup> | 8.3       | 247.9 <sup>b</sup> | 12.3           | <0.0001 |
| Fruit                     | 24.2        | 1.5 | 20.0       | 2.0 | 0.11    | 16.9               | 1.2 | 13.9               | 1.6 | 8.8                | 2.4  | 10.9               | 2.5  | 16.2                   | 3.5  | 0.07          | 12.1               | 1.1                | 15.5               | 3.6       | 10.0               | 2.7            | 0.42    |
| Fish and shellfish        | 4.5         | 0.5 | 10.0       | 1.1 | <0.0001 | 20.3 <sup>ab</sup> | 1.3 | 24.7 <sup>a</sup>  | 1.8 | 7.0 <sup>c</sup>   | 1.5  | 12.2 <sup>bc</sup> | 1.6  | 41.2 <sup>d</sup>      | 6.9  | <0.0001       | 39.6 <sup>a</sup>  | 1.6                | 52.1 <sup>b</sup>  | 4.6       | 38.7 <sup>ab</sup> | 5.7            | 0.03    |
| Meat                      | 6.3         | 0.5 | 9.0        | 1.0 | 0.01    | 29.6 <sup>a</sup>  | 1.3 | 36.5 <sup>b</sup>  | 2.2 | 20.9 <sup>ac</sup> | 2.7  | 17.3 <sup>c</sup>  | 2.3  | 44.0 <sup>b</sup>      | 4.3  | <0.0001       | 50.0 <sup>a</sup>  | 1.7                | 61.6 <sup>a</sup>  | 5.2       | 82.8 <sup>b</sup>  | 6.1            | <0.0001 |
| Eggs                      | 9.7         | 0.7 | 17.9       | 1.3 | <0.0001 | 12.6 <sup>a</sup>  | 0.8 | 17.5 <sup>bc</sup> | 1.3 | 11.5 <sup>ab</sup> | 2.1  | 11.9 <sup>ab</sup> | 1.8  | 24.4 <sup>c</sup>      | 2.4  | <0.0001       | 12.8               | 0.7                | 13.5               | 1.9       | 14.8               | 2.4            | 0.66    |
| Dairy products            | 66.2        | 2.9 | 41.9       | 3.5 | <0.0001 | 19.4 <sup>a</sup>  | 1.8 | 10.2 <sup>b</sup>  | 1.7 | 6.9 <sup>b</sup>   | 3.3  | 7.7 <sup>b</sup>   | 2.5  | 9.2 <sup>ab</sup>      | 2.8  | 0.0001        | 14.7               | 1.4                | 10.2               | 2.7       | 11.8               | 2.7            | 0.42    |
| Fat and oil               | 4.7         | 0.2 | 3.5        | 0.4 | 0.003   | 8.9                | 0.5 | 8.2                | 0.8 | 7.3                | 0.7  | 7.1                | 0.9  | 5.8                    | 0.9  | 0.21          | 8.5 <sup>a</sup>   | 0.4                | 10.0 <sup>a</sup>  | 1.2       | 4.0 <sup>b</sup>   | 0.7            | 0.0017  |
| Confectioneries           | 7.1         | 0.8 | 2.3        | 0.7 | 0.0002  | 6.4                | 0.9 | 4.7                | 1.2 | 9.4                | 3.0  | 3.8                | 1.8  | 7.2                    | 2.0  | 0.34          | 4.1                | 0.6                | 3.4                | 0.9       | 3.0                | 1.3            | 0.75    |
| Fruit and vegetable juice | 7.9         | 1.2 | 6.1        | 1.5 | 0.37    | 5.9                | 1.5 | 1.4                | 0.7 | 3.0                | 1.9  | 9.4                | 5.5  | 1.9                    | 1.9  | 0.15          | 2.5                | 0.6                | 2.8                | 1.5       | 0.0                | 0.0            | 0.41    |
| Alcoholic beverages       | 0.2         | 0.0 | 0.7        | 0.1 | <0.0001 | 4.6                | 1.1 | 2.7                | 0.5 | 5.4                | 3.8  | 5.5                | 4.2  | 9.5                    | 3.7  | 0.33          | 22.9 <sup>a</sup>  | 2.2                | 673.3 <sup>b</sup> | 25.1      | 97.5 <sup>c</sup>  | 16.8           | <0.0001 |
| Soft drinks               | 5.1         | 1.1 | 3.5        | 0.9 | 0.34    | 8.9                | 2.0 | 1.9                | 1.3 | 2.9                | 1.6  | 4.0                | 1.8  | 0.0                    | 0.0  | 0.052         | 10.6               | 1.9                | 8.3                | 4.2       | 17.5               | 7.9            | 0.48    |
| Tea and coffee            | 173.6       | 6.1 | 227.4      | 7.8 | <0.0001 | 121.5 <sup>a</sup> | 5.7 | 296.7 <sup>b</sup> | 8.9 | 146.7 <sup>a</sup> | 17.4 | 151.0 <sup>a</sup> | 13.4 | 156.4 <sup>a</sup>     | 14.2 | <0.0001       | 150.9 <sup>a</sup> | 5.0                | 51.3 <sup>b</sup>  | 8.0       | 152.2 <sup>a</sup> | 16.2           | <0.0001 |
| Seasonings and spices     | 8.2         | 1.0 | 19.4       | 2.2 | <0.0001 | 40.7 <sup>a</sup>  | 2.4 | 38.7 <sup>a</sup>  | 3.2 | 121.6 <sup>b</sup> | 12.6 | 78.0 <sup>c</sup>  | 8.5  | 67.7 <sup>c</sup>      | 7.7  | <0.0001       | 44.8 <sup>a</sup>  | 2.0                | 43.0 <sup>a</sup>  | 4.3       | 68.9 <sup>b</sup>  | 9.3            | 0.001   |

SE, standard error.<sup>1</sup> Each cluster represents a group of meals with a similar dish-based dietary pattern. For breakfast, differences between two dietary patterns were tested with an independent t-test. For lunch and dinner, mean values between clusters without common letter differ,  $P < 0.05$  tested with ANOVA and Tukey post-hoc test.
